# Supplementary material for: Transcriptome and Metabolome Analyses Reveals the Pathway and Metabolites of Grain Quality Under Phytochrome B in Rice (Oryza sativa L.)
Source: Rice (N Y). 2022 Oct 27;15:52. doi: 10.1186/s12284-022-00600-5 (PMC9613846; doi:10.1186/s12284-022-00600-5)
Supplement: Supplementary file 4 — Additional file 4. Table S4. Network statistics of differential metabolites and related genes. [file 12284_2022_600_MOESM4_ESM.xlsx]

## Sheet: Fig.6
Table S4. Network statistics of differential metabolites and related genes.
a
Source	Target	EdgeAttri	Interration	color	Pvalue
Os04g0486600	mws0376	-0.992	N	#FFA000	0.000106772
Os07g0197100	mws0376	-0.991	N	#FFA000	0.000125052
Os03g0164700	mws0214	-0.979	N	#FFA000	0.00065187
Os01g0866400	mws1155	-0.977	N	#FFA000	0.00077497
Os01g0866400	mws0214	-0.976	N	#FFA000	0.000845409
Os03g0164700	mws1155	-0.972	N	#FFA000	0.00116424
Os01g0742500	mws0214	-0.959	N	#FFA000	0.00248048
Os04g0504600	mws0376	-0.959	N	#FFA000	0.00251915
Os03g0208900	mws1155	-0.953	N	#FFA000	0.00320359
Os03g0208900	mws0214	-0.952	N	#FFA000	0.00336246
Os01g0742500	mws1155	-0.943	N	#FFA000	0.0047994
Os05g0186300	mws1050	-0.939	N	#FFA000	0.00549738
Os01g0720700	mws0192	-0.918	N	#FFA000	0.00991667
Os06g0326400	mws1155	0.923	P	#FFA000	0.00866032
Os02g0222100	mws0281	0.925	P	#FFA000	0.00824308
Os04g0486600	mws0281	0.925	P	#FFA000	0.00813298
Os07g0197100	mws0192	0.928	P	#FFA000	0.00769021
Os01g0720700	mws0376	0.93	P	#FFA000	0.00714135
Os04g0504600	mws0192	0.939	P	#FFA000	0.0054459
Os06g0326400	mws0214	0.939	P	#FFA000	0.00554142
Os03g0828500	mws0214	0.948	P	#FFA000	0.00400346
Os04g0531100	mws1155	0.95	P	#FFA000	0.00362981
Os03g0828500	mws1155	0.951	P	#FFA000	0.00351936
Os04g0531100	mws0214	0.952	P	#FFA000	0.00335964
Os04g0486600	mws0192	0.965	P	#FFA000	0.00177481
Os07g0616500	mws0281	0.981	P	#FFA000	0.000544837
Os04g0504600	mws0281	0.982	P	#FFA000	0.000491202
b
Os01g0761300	pmb2778	0.920925	P	#FFA000	0.00913208
Os01g0761300	pmb0865	0.931729	P	#FFA000	0.00683229
Os04g0465600	pmb2406	0.925313	P	#FFA000	0.00815889
Os07g0222000	pmb0164	0.94495	P	#FFA000	0.00446234
Os07g0222000	pmp001281	0.932536	P	#FFA000	0.00667347
Os10g0463200	mws1490	0.923714	P	#FFA000	0.0085073
Os10g0463200	pmb2778	0.951496	P	#FFA000	0.00347187
Os10g0463200	pmn001611	0.951885	P	#FFA000	0.00341691
Os10g0463200	pmb0865	0.953106	P	#FFA000	0.00324708
Os02g0816200	Hmyn007168	0.954593	P	#FFA000	0.00304587
Os05g0159300	Hmyn007168	0.924991	P	#FFA000	0.0082285
Os05g0401000	Rfmb091	0.942071	P	#FFA000	0.00493652
Os05g0401000	mws1490	0.948801	P	#FFA000	0.00386497
Os05g0401000	pmb0889	0.920113	P	#FFA000	0.00931808
Os05g0401000	pmb2778	0.946431	P	#FFA000	0.00422766
Os05g0401000	pmn001611	0.941141	P	#FFA000	0.0050947
Os05g0401000	pmn001688	0.960539	P	#FFA000	0.00230501
Os05g0401000	pmn001694	0.955018	P	#FFA000	0.00298961
Os05g0401000	pmb0865	0.937367	P	#FFA000	0.00576145
Os06g0157000	Hmyn007168	0.942716	P	#FFA000	0.00482813
Os06g0157000	pmb0865	0.940015	P	#FFA000	0.00528945
Os06g0636700	Hmyn007168	0.917759	P	#FFA000	0.00986723
Os07g0642200	pmb2778	0.921566	P	#FFA000	0.0089865
Os07g0642200	pmn001688	0.922311	P	#FFA000	0.00881887
Os12g0114500	pmb2260	0.95757	P	#FFA000	0.00266221
Os12g0114800	pmb2778	0.938609	P	#FFA000	0.00553766
Os12g0114800	pmn001611	0.924117	P	#FFA000	0.00841883
Os12g0114800	pmb0865	0.945818	P	#FFA000	0.00432397
Os03g0808500	pmb0854	0.9499	P	#FFA000	0.00370219
Os03g0808500	pmb2406	0.963283	P	#FFA000	0.00199741
Os11g0115100	pmb2778	0.952781	P	#FFA000	0.00329186
Os11g0115100	pmn001611	0.933672	P	#FFA000	0.0064532
Os11g0115100	pmb0865	0.945059	P	#FFA000	0.00444486
Os07g0287400	pmb2260	0.925465	P	#FFA000	0.00812617
Os06g0711900	pmn001495	0.934039	P	#FFA000	0.00638271
Os03g0369100	pmb2778	0.920549	P	#FFA000	0.00921796
Os03g0766350	pmb0854	0.938461	P	#FFA000	0.00556408
Os03g0766350	pmb2406	0.920104	P	#FFA000	0.00931995
c
Os02g0183900	mws0001	-0.996	N	#FFA000	2.43296e-05
Os09g0375000	mws0671	-0.994	N	#FFA000	4.825e-05
Os05g0482700	pme0193	-0.991	N	#FFA000	0.00012289
Os03g0279400	pme0193	-0.988	N	#FFA000	0.000226952
Os02g0436400	pme0193	-0.988	N	#FFA000	0.00021244
Os10g0390600	mws0230	-0.987	N	#FFA000	0.000258815
Os04g0165700	pme0026	-0.987	N	#FFA000	0.000247529
Os03g0586800	pme0193	-0.987	N	#FFA000	0.00026729
Os11g0178800	mws0230	-0.984	N	#FFA000	0.000367108
Os10g0390600	pme0193	-0.984	N	#FFA000	0.000380746
Os05g0482700	pme0026	-0.98	N	#FFA000	0.000594529
Os08g0135900	mws0001	-0.978	N	#FFA000	0.000710665
Os03g0291500	pme0026	-0.978	N	#FFA000	0.000739297
Os03g0586800	pme0026	-0.977	N	#FFA000	0.000762585
Os10g0390600	mws0671	-0.975	N	#FFA000	0.000958452
Os12g0625000	mws0254	-0.974	N	#FFA000	0.000991739
Os05g0477200	mws0001	-0.973	N	#FFA000	0.00107563
Os02g0436400	pme0026	-0.972	N	#FFA000	0.00112474
Os12g0625000	pme0193	-0.972	N	#FFA000	0.00115036
Os11g0178800	pme0193	-0.972	N	#FFA000	0.00119
Os08g0320000	pme0193	-0.972	N	#FFA000	0.00115259
Os03g0223400	mws0230	-0.971	N	#FFA000	0.00125052
Os03g0100030	pme1210	-0.97	N	#FFA000	0.00135032
Os08g0320000	mws0254	-0.968	N	#FFA000	0.00148862
Os02g0222100	mws0230	-0.965	N	#FFA000	0.00179
Os05g0482700	mws0671	-0.965	N	#FFA000	0.00182366
Os02g0751800	pme0026	-0.965	N	#FFA000	0.00177551
Os09g0375000	mws0230	-0.964	N	#FFA000	0.00195672
Os05g0482700	mws0254	-0.964	N	#FFA000	0.00191594
Os11g0178800	pme0026	-0.964	N	#FFA000	0.00197149
Os02g0222100	mws0671	-0.963	N	#FFA000	0.00203332
Os02g0180500	mws0230	-0.961	N	#FFA000	0.00230475
Os10g0390600	pme0026	-0.961	N	#FFA000	0.00223586
Os08g0320000	mws0230	-0.96	N	#FFA000	0.00233651
Os03g0223400	mws0671	-0.96	N	#FFA000	0.00241091
Os07g0585600	mws1050	-0.959	N	#FFA000	0.00250322
Os03g0586800	mws0230	-0.958	N	#FFA000	0.00264057
Os03g0279400	mws0671	-0.958	N	#FFA000	0.00265485
Os09g0375000	pme0193	-0.956	N	#FFA000	0.00282383
Os01g0118000	pme0026	-0.955	N	#FFA000	0.0029951
Os02g0436400	mws0254	-0.954	N	#FFA000	0.00308378
Os12g0625000	mws0671	-0.953	N	#FFA000	0.00324523
Os09g0539100	pme0026	-0.953	N	#FFA000	0.00331986
Os05g0558900	mws0230	-0.952	N	#FFA000	0.00338649
Os07g0617100	pme0026	-0.951	N	#FFA000	0.00355591
Os02g0183900	pme1210	-0.951	N	#FFA000	0.00349224
Os10g0523700	mws1050	-0.95	N	#FFA000	0.00363415
Os03g0651000	mws0230	-0.949	N	#FFA000	0.00382377
Os10g0390600	mws0254	-0.949	N	#FFA000	0.00385483
Os11g0178800	mws0254	-0.948	N	#FFA000	0.00391448
Os04g0165700	pme0193	-0.948	N	#FFA000	0.00404725
Os05g0482700	mws0230	-0.947	N	#FFA000	0.00412408
Os04g0165700	mws0254	-0.947	N	#FFA000	0.00412154
Os03g0586800	mws0254	-0.946	N	#FFA000	0.00430444
Os03g0291500	pmp001213	-0.946	N	#FFA000	0.00429691
Os12g0625000	mws0230	-0.945	N	#FFA000	0.00445672
Os03g0100030	mws0001	-0.944	N	#FFA000	0.00453496
Os07g0585600	mws0001	-0.941	N	#FFA000	0.00506217
Os03g0223400	pme0008	-0.939	N	#FFA000	0.00555638
Os07g0694600	pme0193	-0.936	N	#FFA000	0.0061034
Os11g0179000	mws0230	-0.935	N	#FFA000	0.0062796
Os07g0617100	pme0193	-0.935	N	#FFA000	0.00618695
Os02g0751800	mws0254	-0.932	N	#FFA000	0.00683531
Os03g0279400	mws0254	-0.931	N	#FFA000	0.00699099
Os02g0133100	mws0260	-0.931	N	#FFA000	0.00706458
Os03g0279400	mws0230	-0.93	N	#FFA000	0.00708029
Os04g0165700	mws0671	-0.93	N	#FFA000	0.00711785
Os03g0279400	pme0026	-0.93	N	#FFA000	0.00714911
Os10g0400100	pme1210	-0.93	N	#FFA000	0.00708595
Os11g0179000	pme0193	-0.928	N	#FFA000	0.00760135
Os02g0436400	mws0250	-0.927	N	#FFA000	0.00788599
Os08g0320000	pme0026	-0.927	N	#FFA000	0.00784636
Os02g0180500	mws0671	-0.926	N	#FFA000	0.00793599
Os02g0436400	mws0230	-0.925	N	#FFA000	0.00817869
Os07g0694600	pme0026	-0.925	N	#FFA000	0.00833074
Os02g0222100	pme0193	-0.925	N	#FFA000	0.00820634
Os03g0111700	mws0001	-0.924	N	#FFA000	0.00849632
Os04g0165700	mws0230	-0.924	N	#FFA000	0.00839241
Os03g0291500	mws0254	-0.923	N	#FFA000	0.00857011
Os12g0625000	pme0026	-0.923	N	#FFA000	0.00865823
Os10g0523700	mws0001	-0.92	N	#FFA000	0.00929452
Os08g0320000	mws0250	-0.919	N	#FFA000	0.00951922
Os10g0400100	mws0001	-0.918	N	#FFA000	0.00976675
Os02g0222100	mws0281	0.925	P	#FFA000	0.00824308
Os04g0486600	mws0281	0.925	P	#FFA000	0.00813298
Os12g0625000	pme1210	0.925	P	#FFA000	0.00821167
Os03g0100030	pmp001213	0.925	P	#FFA000	0.00821598
Os10g0400100	mws0250	0.926	P	#FFA000	0.00791597
Os03g0826500	pme0026	0.928	P	#FFA000	0.0075932
Os07g0585600	pmp001213	0.93	P	#FFA000	0.0071322
Os05g0477200	mws0254	0.932	P	#FFA000	0.00676372
Os09g0539100	mws1050	0.933	P	#FFA000	0.00666025
Os04g0531100	mws0250	0.938	P	#FFA000	0.00569558
Os02g0183900	mws0250	0.938	P	#FFA000	0.00571199
Os01g0118000	mws0001	0.939	P	#FFA000	0.00550553
Os05g0477200	mws0250	0.941	P	#FFA000	0.00516323
Os08g0135900	pmp001213	0.943	P	#FFA000	0.00477676
Os10g0523700	pmp001213	0.943	P	#FFA000	0.00471594
Os02g0180500	mws0281	0.944	P	#FFA000	0.00468011
Os04g0486600	mws0260	0.945	P	#FFA000	0.00437763
Os04g0165700	mws0001	0.946	P	#FFA000	0.00435439
Os03g0826500	pme0193	0.95	P	#FFA000	0.00363699
Os03g0826500	mws0230	0.951	P	#FFA000	0.00353071
Os03g0826500	mws0254	0.951	P	#FFA000	0.00357676
Os05g0477200	pmp000967	0.951	P	#FFA000	0.00356786
Os03g0100030	pme0193	0.953	P	#FFA000	0.00329372
Os02g0183900	mws0254	0.955	P	#FFA000	0.00295086
Os09g0539100	mws0001	0.956	P	#FFA000	0.00282518
Os03g0100030	pme0026	0.958	P	#FFA000	0.00266349
Os03g0223400	mws0281	0.96	P	#FFA000	0.0023719
Os02g0183900	pmp001213	0.962	P	#FFA000	0.0020911
Os05g0477200	pme0026	0.963	P	#FFA000	0.00200398
Os04g0531100	pmp000967	0.963	P	#FFA000	0.00203581
Os02g0183900	pme0026	0.968	P	#FFA000	0.00155391
Os05g0477200	pmp001213	0.968	P	#FFA000	0.00151965
Os03g0100030	mws0250	0.979	P	#FFA000	0.000640916
Os03g0826500	mws0671	0.98	P	#FFA000	0.000612216
Os03g0100030	mws0254	0.983	P	#FFA000	0.000413038
Os02g0751800	mws0001	0.985	P	#FFA000	0.000321229
Os03g0291500	mws0001	0.991	P	#FFA000	0.000129651
d
Os10g0563700	pme0193	-0.995	N	#FFA000	3.81e-05
Os10g0563700	pme0193	-0.995	N	#FFA000	3.81e-05
Os01g0837600	pme0193	-0.982	N	#FFA000	0.00048959
Os01g0837600	pme0193	-0.982	N	#FFA000	0.00048959
Os03g0174500	pme0033	-0.977	N	#FFA000	0.000793538
Os03g0320900	pme0193	-0.96	N	#FFA000	0.00232765
Os06g0352200	mws0470	-0.954	N	#FFA000	0.00307992
Os05g0573300	pme0193	-0.954	N	#FFA000	0.00312118
Os03g0313600	pme0193	-0.942	N	#FFA000	0.00499391
Os03g0174500	pme0193	-0.936	N	#FFA000	0.00593753
Os10g0563700	pme0033	-0.934	N	#FFA000	0.00638405
Os02g0137100	pme0257	-0.93	N	#FFA000	0.00710144
Os01g0837600	pme0040	-0.928	N	#FFA000	0.00762515
Os03g0174500	mws0874	-0.927	N	#FFA000	0.00773299
Os03g0320900	pme0040	-0.926	N	#FFA000	0.00804911
Os07g0639900	pme0193	-0.924	N	#FFA000	0.0083491
Os03g0729100	pme0193	0.92	P	#FFA000	0.00930733
Os03g0729100	pme0040	0.947	P	#FFA000	0.0040688
Os02g0479100	pme0033	0.951	P	#FFA000	0.00357654
Os01g0865100	mws0874	0.959	P	#FFA000	0.00253246
Os01g0865100	pme0040	0.965	P	#FFA000	0.00179128
Os03g0780500	pme0040	0.978	P	#FFA000	0.000698139
e
Os10g0478200	pme0193	-0.977	N	#FFA000	0.00341058
Os04g0683700	pme0193	-0.976	N	#FFA000	0.00104775
Os01g0328700	pme0193	-0.973	N	#FFA000	0.000544837
Os05g0574400	pme0193	-0.961	N	#FFA000	0.00313636
Os02g0249800	pme0193	-0.954	N	#FFA000	0.000830192
Os04g0504600	mws0192	0.939	P	#FFA000	0.000491202
Os04g0486950	pme0193	0.952	P	#FFA000	0.0023719
Os03g0223400	mws0281	0.96	P	#FFA000	0.000816474
Os07g0616500	mws0281	0.981	P	#FFA000	0.0054459
Os04g0504600	mws0281	0.982	P	#FFA000	0.00229784
f
Os02g0812000	mws0093	-0.929	N	#FFA000	0.00728142
Os09g0560300	mws0093	0.919	P	#FFA000	0.0095461
Os01g0528800	pmp001213	0.925	P	#FFA000	0.00826013
Os04g0651000	pmp001213	0.947	P	#FFA000	0.00412385
Os02g0626100	pmp001213	0.953	P	#FFA000	0.00326517
Os07g0530400	mws0093	0.965	P	#FFA000	0.00180599
Os11g0210100	mws0093	0.974	P	#FFA000	0.00101038
Os08g0363000	mws0093	0.977	P	#FFA000	0.00079083
Os06g0216100	pmb3894	-0.964	N	#FFA000	0.00190182
Os06g0216100	pme0088	0.938	P	#FFA000	0.00557367
g
Os03g0352800	mws0376	-0.93	N	#FFA000	0.00712975
Os03g0806900	mws0376	-0.928	N	#FFA000	0.00763797
Os05g0481600	mws0376	-0.925	N	#FFA000	0.00828508
Os05g0156900	mws0376	-0.921	N	#FFA000	0.00910668
Os03g0806900	mws0192	0.936	P	#FFA000	0.00604881
Os05g0156900	mws0192	0.972	P	#FFA000	0.0011616
h
Os07g0241500	mws1050	-0.986	N	#FFA000	0.00027771
Os01g0646300	Hmln001566	0.926	P	#FFA000	0.00798152
Os01g0306400	Hmln001566	0.987	P	#FFA000	0.000271998
Os03g0297600	Hmln001566	0.946	P	#FFA000	0.00422172
Os02g0833600	Hmln001566	0.927	P	#FFA000	0.00769783
Os07g0143200	Hmln001566	0.997	P	#FFA000	1.56e-05
